# Supplementary material for: Morphotropic phase boundary-based BaTi0.89Sn0.11O3 filler induced polarization tuned P(VDF-TrFE) composites as efficient piezo-tribo hybrid nanogenerators
Source: Royal Society of Chemistry journal article supplement (doi:10.1039/d3se01682j), 2024-01-01
Supplement: d3se01682j1.pdf [file d3se01682j1.pdf]

**ELECTRONIC SUPPLEMENTARY INFORMATION (ESI)**

**Title: Morphotropic phase boundary based BaTi<sub>0.89</sub>Sn<sub>0.11</sub>O<sub>3</sub> filler induced polarization tuned P(VDF-TrFE) composites as efficient piezo-tribo hybrid nanogenerators**

Payel Maiti,<sup>\*a</sup> Abhishek Sasmal,<sup>b</sup> A. Arockiarajan,<sup>b,c</sup> Rahul Mitra<sup>a</sup>

<sup>a</sup>Department of Metallurgical and Materials Engineering, Indian Institute of Technology Kharagpur (IIT Kharagpur), Kharagpur, West Bengal – 721302, India

<sup>b</sup>Department of Applied Mechanics, Indian Institute of Technology Madras (IIT Madras), Chennai, Tamil Nadu - 600036, India

<sup>c</sup>Centre of Excellence in Ceramics Technologies for Futuristic Mobility, Indian Institute of Technology Madras (IIT Madras), Chennai, Tamil Nadu - 600036, India

\*E-mail ID: [maiti.payel4@gmail.com](mailto:maiti.payel4@gmail.com)

**Fig. S1**

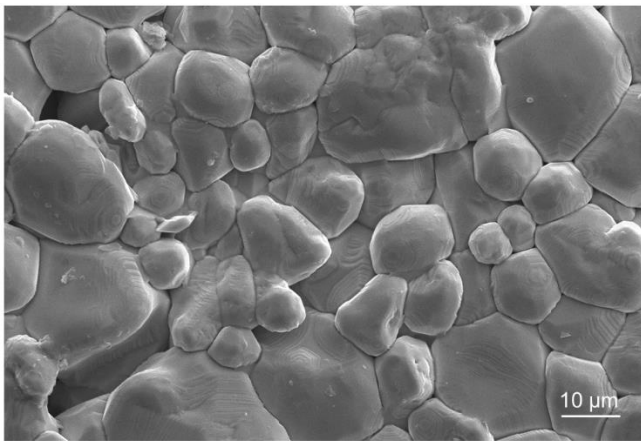

**Fig. S1.** SEM image of the fabricated BTS pellet.

**Fig. S2**

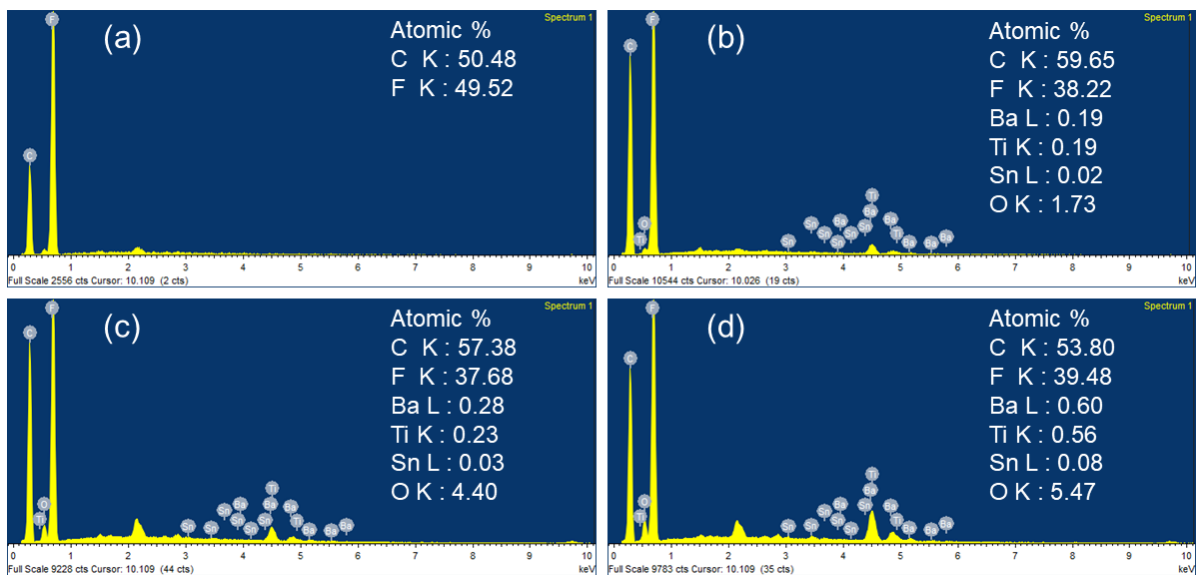

**Fig. S2.** EDX spectra of (a) P(VDF-TrFE), (b) BTS5W, (c) BTS10W, and (d) BTS15W films.

**Fig. S3.**

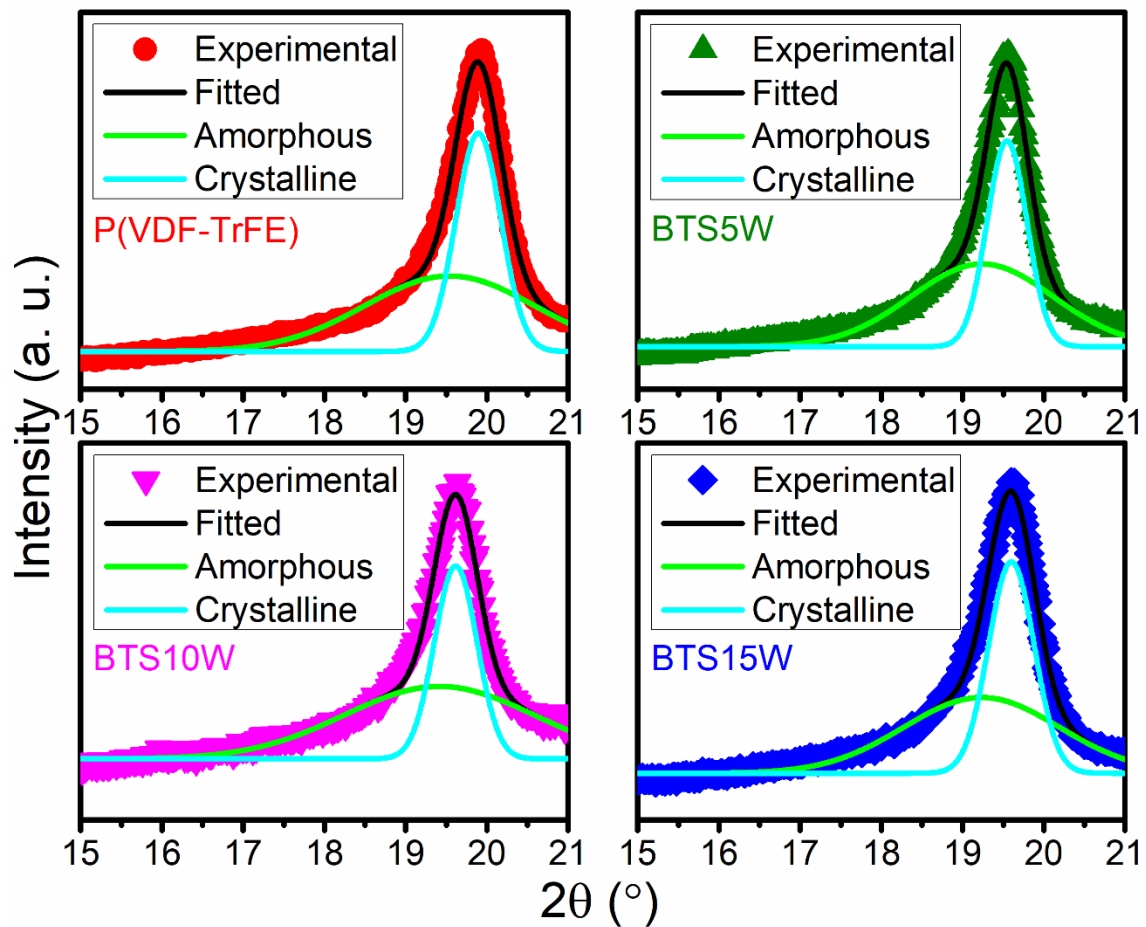

**Fig. S3.** Deconvoluted  $20^\circ$  XRD peak for all the fabricated composite films.

**Fig. S4**

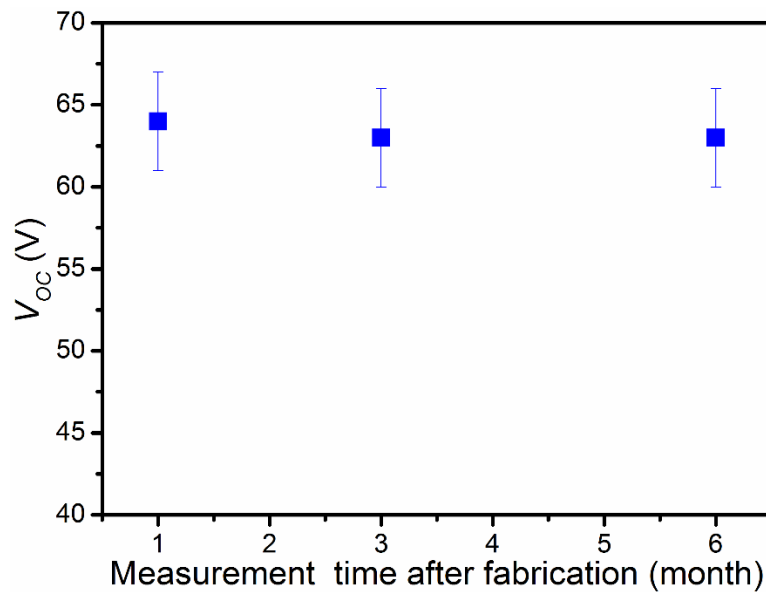

**Fig. S4.** Average output  $V_{OC}$  of the BTS15W-based PENG after certain time gap of its fabrication showing its sufficient stability.

**Fig. S5**

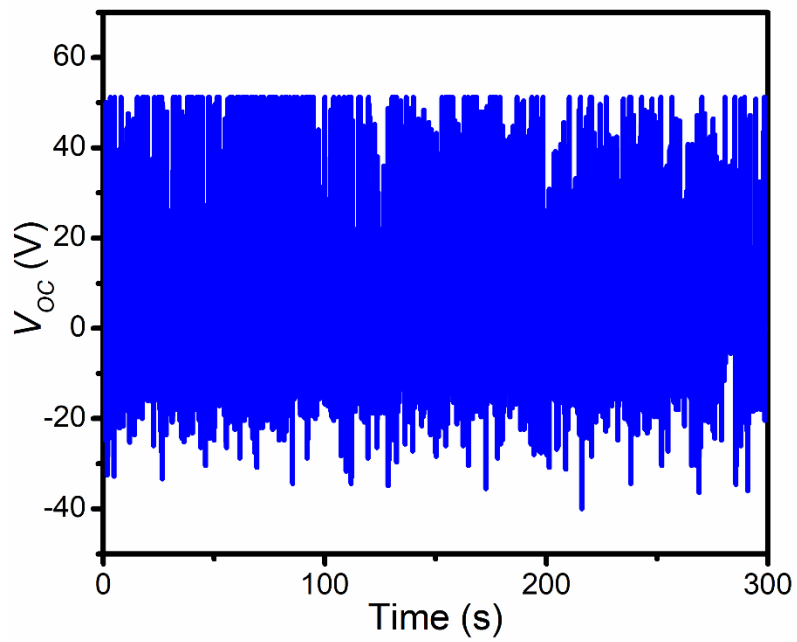

**Fig. S5.** Long cycle stability test of the BTS15W based PENG.

**Fig. S6**

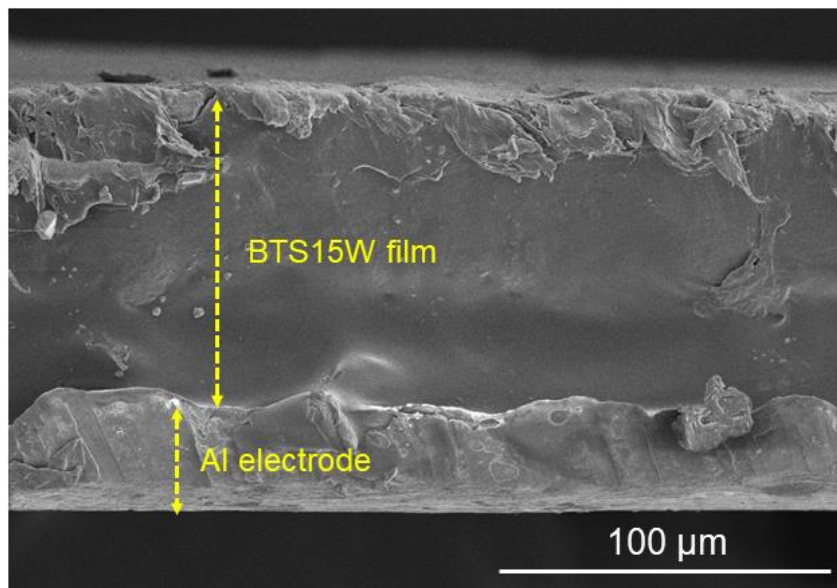

**Fig. S6.** Cross-sectional SEM image of the BTS15W film electrode with adhesive Al electrode on one surface.

**Fig. S7**

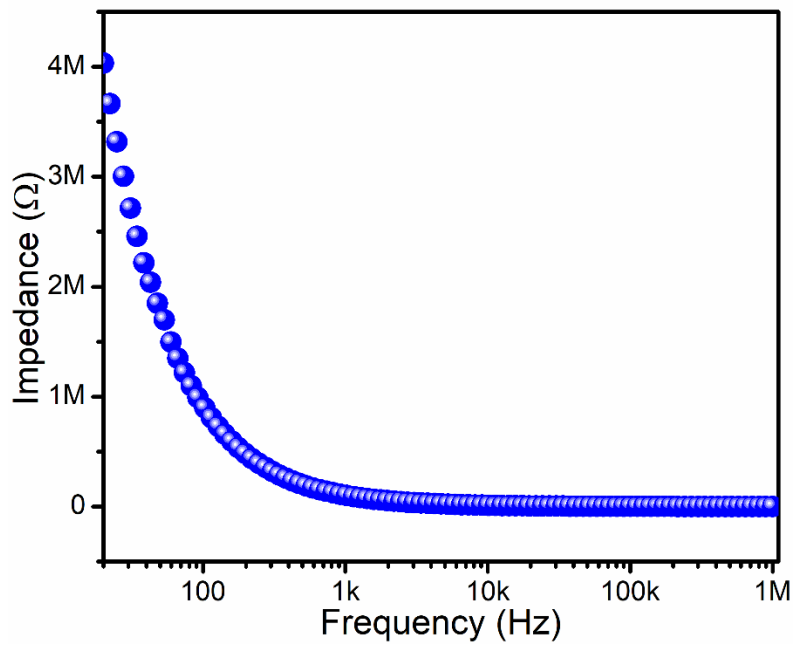

**Fig. S7.** Frequency dependent impedance spectrum of the BTS15W film.

**Fig. S8**

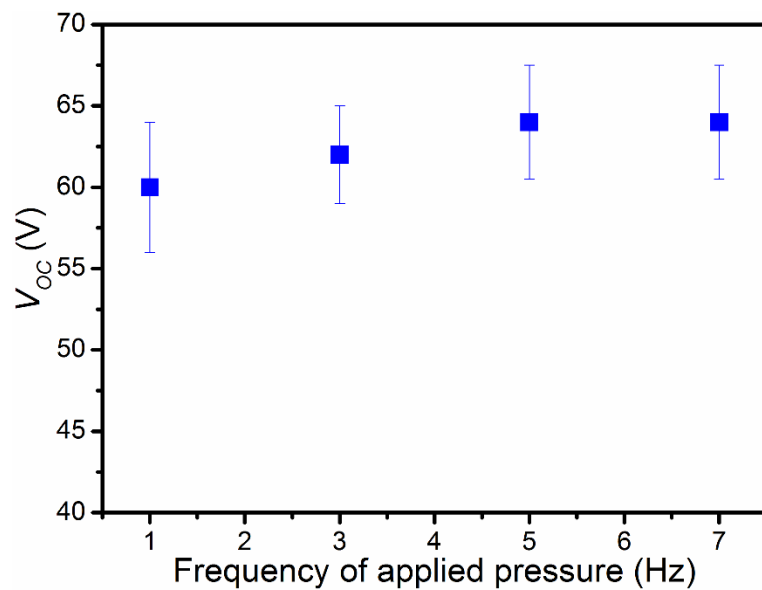

**Fig. S8.** Variation of average output  $V_{OC}$  of the BTS15W-based PENG with the variation of frequency of applied pressure.

**Fig. S9**

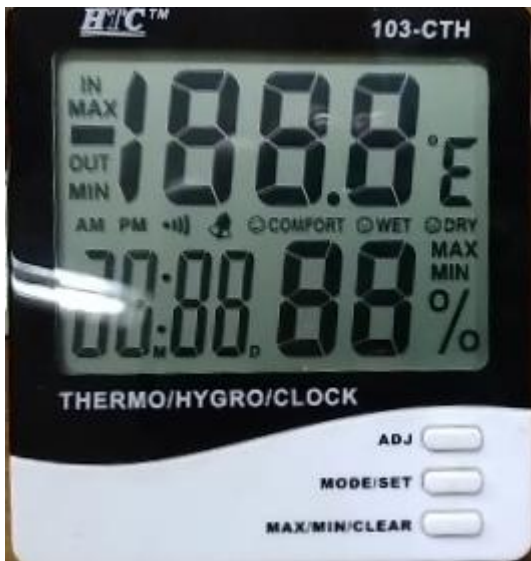

**Fig. S9.** Powering up a digital hygrometer by using the stored charge of a 10  $\mu$ F capacitor (using the rectified output of BTS15W-based HNG).
